# Supplementary material
Source: PubMed Central journal article supplement (PMC2704547)
Supplement: btm601_1.pdf [file btm601_1.pdf]

## SUPPLEMENTARY INFORMATION

### 1 PROPERTIES OF THE PWC REPRESENTATION

The representation presented in section 2.3 was initially inspired by the concept of wavelet footprints (Dragotti and Vetterli, 2002) where the more general case of piece-wise polynomial signals is considered from a wavelet analysis perspective. The *maximally sparse* representation for PWC signals demonstrated in wavelet footprints is reformulated here using standard linear algebra and extended to arbitrary vector lengths. This also allows us to establish a correspondence between sets of breakpoints and a *nested structure* of vector subspaces which we use here to demonstrate the representation properties.

Mathematically, a PWC vector  $\mathbf{x}$  can be completely characterized by its change locations (i.e., breakpoints) and the constant values of the regions in between (i.e., segment amplitudes):

**DEFINITION 1 (PWC vector).** *A piece-wise constant vector  $\mathbf{x} = (x_1, \dots, x_M)^t$  is characterized by an ordered set of  $K$  discontinuity locations  $\mathcal{I} = \{i_1 < i_2 \dots < i_K\} \subset \{1, \dots, M-1\}$  ( $i_k$  denotes the beginning position of segment  $k$ ) and a vector with the corresponding  $K+1$  segment amplitudes  $\mathbf{a} = (a_0, \dots, a_K)^t$ . Thus:*

$$\mathbf{x}^t = \left( \begin{array}{cccccccc} a_0, & \dots, & a_0, & a_1, & \dots, & a_{k-1}, & a_{k-1}, & a_k, & a_k, & \dots, & a_K \end{array} \right) \quad (22)$$

$\uparrow_1$ 
 $\uparrow_{i_1}$ 
 $\uparrow_{i_k}$ 
 $\uparrow_M$

With this definition it is easy to show that the breakpoint sets  $\mathcal{I}$ s induce the following vector subspace properties:

**LEMMA 1 (PWC Vector Subspaces).** *Let  $\mathcal{S}_{\mathcal{I}}$  be the set of all PWC vectors  $\mathbf{x}$  that have breakpoint locations contained in  $\mathcal{I}$ , and segment amplitudes  $\mathbf{a} \in \mathbb{R}^{K+1}$ . Then, we have that:*

- i)  $\mathcal{S}_{\mathcal{I}}$  is a subspace of  $\mathbb{R}^M$  of dimension  $K+1$ .
- ii)  $\mathcal{S}_{\mathcal{I}_1}$  is a subspace of  $\mathcal{S}_{\mathcal{I}_2}$  if and only if  $\mathcal{I}_1 \subset \mathcal{I}_2$

**PROOF.** It is clear that i) holds since, first, for any  $\mathbf{x}_1, \mathbf{x}_2$  with breakpoints in  $\mathcal{I}$ , but different amplitudes  $\mathbf{a}_1$  and  $\mathbf{a}_2$ ; we have that  $\mathbf{x}_3 = \mathbf{x}_1 + \mathbf{x}_2$  may remove existing breakpoints but never create a breakpoint outside  $\mathcal{I}$ , thus  $\mathbf{x}_3 \in \mathcal{S}_{\mathcal{I}}$  because it will always have breakpoints contained in the same  $\mathcal{I}$ , and  $\mathbf{a}_3 = \mathbf{a}_1 + \mathbf{a}_2$ . Second, for any  $\mathbf{x}_1 \in \mathcal{S}_{\mathcal{I}}$  and for all  $\alpha$ ,  $\mathbf{x}_4 = \alpha \mathbf{x}_1$  will also have breakpoints contained in  $\mathcal{I}$  with  $\mathbf{a}_4 = \alpha \mathbf{a}_1$  and thus will belong to  $\mathcal{S}_{\mathcal{I}}$ . Furthermore, when  $\mathcal{I}$  is fixed  $\mathbf{x}$  and  $\mathbf{a}$  vector spaces are isomorphic and hence  $\mathcal{S}_{\mathcal{I}}$  has dimension  $K+1$ ; thus, ii) readily follows from i).  $\square$

Part ii) of the lemma is equivalent to saying that any PWC vector  $\mathbf{x} \in \mathcal{S}_{\mathcal{I}}$  can be represented as a linear combination of step vectors in  $\mathcal{S}_{\{k\}}$ ,  $k = i_1, \dots, i_K$ . With this principle in mind, we now introduce a basis for PWC signal representation that has some desirable properties.

**THEOREM 1 (PWC Basis).** *Define a matrix  $\mathbf{F} = [\mathbf{f}_0, \mathbf{f}_1, \dots, \mathbf{f}_{M-1}]$ , with columns  $\mathbf{f}_i$  where  $\mathbf{f}_0 = \mathbf{1}_M / \sqrt{M}$  is a constant vector and the remaining columns are step vectors:*

$$\mathbf{f}_i(m) = \begin{cases} -\sqrt{\frac{M-i}{iM}} & m \leq i \\ \sqrt{\frac{i}{M(M-i)}} & m > i \end{cases} \quad (23)$$

Then, we have the following properties:

i) (Complete Basis): *The columns of  $\mathbf{F}$  are a basis for  $\mathbb{R}^M$ , i.e., for any  $\mathbf{x} \in \mathbb{R}^M$  there exists a unique  $\mathbf{w}$  such that  $\mathbf{x} = \mathbf{F}\mathbf{w}$ .*

ii) (Nested Structure): *The columns of  $\mathbf{F}_{\mathcal{I}} = [\mathbf{f}_0, \mathbf{f}_{i_1}, \dots, \mathbf{f}_{i_K}]$  are a basis for the vector subspace  $\mathcal{S}_{\mathcal{I}}$ , formed by PWC vectors with breakpoints at  $\mathcal{I} = \{i_1 < i_2 \dots < i_K\}$ .*

iii) (Maximal Sparseness): *Any PWC vector  $\mathbf{x} \in \mathcal{S}_{\mathcal{I}}$ , can be written as  $\mathbf{x} = \mathbf{F}\mathbf{w}$ , where  $\mathbf{w}$  has as many as  $|\mathcal{I}| + 1$  non-zero entries, which is the minimal amount possible (maximal sparseness). Moreover, if the non-zero weights are  $\mathbf{w}_{\mathcal{I}} = [w_0, w_{i_1}, \dots, w_{i_K}]$ , we can write  $\mathbf{x} = \mathbf{F}_{\mathcal{I}}\mathbf{w}_{\mathcal{I}}$ , where the subscript  $\mathcal{I}$  denotes that only the columns of  $\mathbf{F}$  (resp. components of  $\mathbf{w}$ ) at the positions corresponding to the indices in  $\mathcal{I}$  are included.*

In order to better understand the previous theorem, we will explain how the basis has been constructed. First, if  $\mathbf{x}$  is a constant vector, i.e., it has no discontinuities,  $\mathcal{I} = \emptyset$ , the dimension of  $\mathcal{S}_0 = \mathcal{S}_{\mathcal{I}=\emptyset}$  is one and can be spanned by the constant vector  $\mathbf{f}_0$ . Then, for  $k = 1, \dots, M-1$  the vector spaces  $\mathcal{S}_k = \mathcal{S}_{\mathcal{I}=\{k\}}$  of PWC vectors with a single discontinuity between  $k$  and  $k+1$  can be spanned by adding the element  $\mathbf{f}_k$ , a step vector with a breakpoint at that position. Moreover, the set of vectors now forms a complete basis: from Lemma 1.ii) any  $\mathbf{x} \in \mathcal{S}_{\mathcal{I}}$  can be represented by linearly combining  $\{\mathbf{f}_0, \mathbf{f}_{i_1}, \dots, \mathbf{f}_{i_K}\}$ . This proves ii) in the theorem, as well as i) when  $\mathcal{I} = \{1, \dots, M\}$ .

Clearly i) holds, since  $\mathbf{F}$  is a square invertible matrix, with the rows of its inverse  $\mathbf{F}^{-1}$  forming the *dual basis*:

$$\begin{aligned} \mathbf{F}^{-1} &= [\tilde{\mathbf{f}}_0, \dots, \tilde{\mathbf{f}}_{M-1}]^t \quad (24) \\ \tilde{\mathbf{f}}_0 &= \frac{1}{\sqrt{M}} \mathbf{1}_M \\ \tilde{\mathbf{f}}_k(m) &= \begin{cases} -\sqrt{\frac{k(N-k)}{N}} & m = k-1 \\ \sqrt{\frac{k(N-k)}{N}} & m = k \\ 0 & \text{otherwise} \end{cases} \end{aligned}$$

The most appealing property for our specific application is iii), since copy number vectors will have very few breakpoints ( $K \ll M$ ) which makes  $\mathbf{w}$  a sparse representation. We can prove iii) by the following argument. First, we cannot have less than  $K+1$  non-zero elements because this is the minimum required to form a basis for  $\mathcal{S}_{\mathcal{I}}$ . Then, for all  $m \notin \mathcal{I}$ , we have that  $x_m - x_{m-1} = 0$ , and using the dual basis,  $\mathbf{w} = \mathbf{F}^{-1}\mathbf{x}$ , we have that for all  $m > 0$   $w_m = 0$  if and only if  $x_m - x_{m-1} = 0$ . Thus, there are exactly  $K+1$  non-zero elements, which is indeed the minimum (so the representation is maximally sparse).

### 2 ALTERNATIVE APPROACHES TO SBL TO EXPLOIT THE PWC REPRESENTATION

Similar problems that involve solving the minimizing problem stated in (8) have already been addressed both in the signal processing and in the statistics literature, leading to similar strategies and methods which are given different names (see Table 4). However, as is discussed in this section, most of these existing methods are severely limited by the high collinearity/coherence (lack of orthogonality) between the columns of  $\mathbf{F}$ .

The first class of strategies, greedy methods, consists of reducing the search space of all possible predictor subsets  $2^M$  by assuming that the best set of  $K_1$  predictors will often be a subset of the best

**Table 4.** Relationship between signal processing methods for overcomplete expansions and methods in statistics for variable selection in multiple regression

| Signal Processing   |                                                         | Statistics                                     |
|---------------------|---------------------------------------------------------|------------------------------------------------|
| Greedy Methods:     |                                                         |                                                |
| MP-FS               | Matching Pursuit (Mallat and Zhang, 1993)               | Forward Selection (Seber and Lee, 2003)        |
| OMP                 | Orthogonal Matching Pursuit (Pati <i>et al.</i> , 1993) |                                                |
| Relaxation methods: |                                                         |                                                |
| MoF-Ridge           | Method of Frames (Chen <i>et al.</i> , 1998)            | Ridge regression (Hastie <i>et al.</i> , 2001) |
| BP-Lasso            | Basis Pursuit (Chen <i>et al.</i> , 1998)               | Lasso (Hastie <i>et al.</i> , 2001)            |

Methods are paired when a similar version of equation (7) is solved (i.e., when the same metrics are chosen). But note that there will be differences in how  $\lambda$  is adjusted, and the size or types of design matrices  $\mathbf{F}$  that are used.

set of  $K_2$  predictors, for  $K_2 > K_1$ . If this assumption is correct, the set of best predictors can be constructed sequentially as in MP-FS; where we start selecting the vector (regressor) with largest projection (largest F-score), and keep adding the vector that most reduces the energy of the residual. This strategy is only optimal when  $\mathbf{F}$  is orthogonal, or nearly optimal (Donoho *et al.*, 2006) when the coherence of  $\mathbf{F}$  ( $C = \max \langle \mathbf{f}_k, \mathbf{f}_j \rangle$   $k \neq j$ ) is small and the signal is “sufficiently” sparse (i.e.,  $\|w\|_0$  is small). It is important to note that this result cannot be applied to our case, since the coherence of  $\mathbf{F}$  approaches 1, i.e., the set of vectors considered here is highly coherent.

The second class of strategies is based on replacing the  $l_0$  sparseness measure  $\|w\|_0$  by some other  $l_p$  measure, such that more efficient optimization methods (such as linear programming, projection or gradient methods) can be used. For example, for  $p = 2$  (i.e.,  $\|w\|_2$ ), we would have a ridge regression in which the two square norms can be easily combined resulting in  $\hat{w}_{\text{ridge}} = (\mathbf{F}^t \mathbf{F} + \lambda \mathbf{I})^{-1} \mathbf{F}^t \mathbf{y}$ . However,  $\hat{w}_{\text{ridge}}$  is not sparse at all in  $l_0$  sense, and thus we would be interested in using a small as possible  $p$ . The  $l_1$  norm is often used, because it is the minimal one for which the constraints form a convex set and thus convex optimization or linear programming can be used to solve the problem. This is the strategy behind basis pursuit (Chen *et al.*, 1998) and lasso (Hastie *et al.*, 2001), for which there exist a similar result as in MP (Donoho *et al.*, 2006) showing that if the coherence is small then minimizing for  $l_1$  is equivalent to minimizing for  $l_0$ . Therefore, when  $\mathbf{F}$  is highly coherent, as in our case, these techniques lead to sub-optimal performance and a new approach is needed.

## 2.1 Comparison to SBL approach

In previous work (Pique-Regi *et al.*, 2007) we demonstrated using the same performance evaluation procedure as in section 3.1 (Willenbrock and Fridlyand, 2005) that the SBL approach presented in this paper had a significantly superior performance than the techniques in Table 4 for the specific application of CNA detection.

The precision-recall operating curves (PROC) were generated for each approach by obtaining the sensitivity and FDR for detected CNA in the simulated CGH dataset at each operating point (Figure

7). SBL had the best performing PROC curve as compared to other approaches for all given values of  $\delta$  (data shown only for  $\delta = 2$ ).

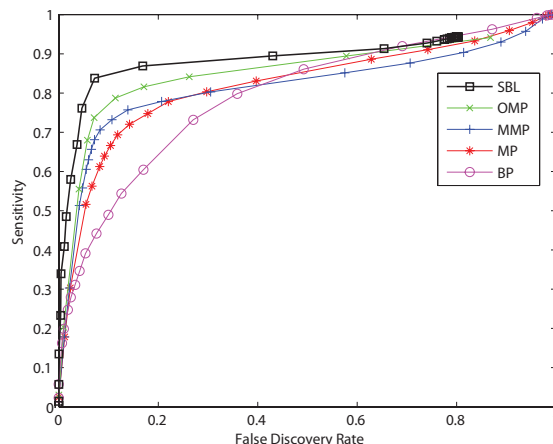

**Fig. 7.** PROC operational curves for sensitivity vs. false discovery rate in detecting real copy number changes within a  $\delta = 2$  sample precision window in the dataset introduced by Willenbrock and Fridlyand (2005).

## 3 SBL ALGORITHM DETAILS

### 3.1 The role of the parameter $a$ in SBL

The parameter  $a$  controls the shape of the prior distribution over the weights  $p(w)$  specified by the hierarchical prior defined by  $p(w|\alpha)$  (12) and  $p(\alpha)$  (13). Following Tipping (2001), the  $\alpha$  hyperparameters can be integrated out to find the marginal “effective” prior  $p(w)$ :

$$\begin{aligned}
 p(w) &= \int p(w|\alpha) p(\alpha) d\alpha \\
 &= \prod_{m=1}^{M-1} \int p(w_m|\alpha_m) p(\alpha_m) d\alpha_m \\
 &= \prod_{m=1}^{M-1} p(w_m)
 \end{aligned} \tag{25}$$

where  $p(w_m)$  is:

$$\begin{aligned}
 p(w_m) &= \int p(w_m|\alpha_m) p(\alpha_m) d\alpha_m \\
 &= \frac{\Gamma(a+1/2)}{\Gamma(a)} \sqrt{\frac{a}{2\pi a}} \sqrt{\frac{a}{b}} \left(1 + \frac{w_m^2}{2b}\right)^{-(\frac{1}{2}+a)}
 \end{aligned} \tag{26}$$

a t-distribution with  $2a$  degrees of freedom and a scale parameter of  $\sqrt{a/b}$ . When  $b \rightarrow 0$  and  $a$  is small, this distribution peaks very sharply at 0, and has very thick flat tails, as shown in Figure 8.

The  $\log$  of  $p(w)$  gives us the sparseness cost measure:

$$\log p(w) = C(a, b) + \left(1 + \frac{a}{2}\right) \sum_{m=0}^{M-1} \log \left(1 + \frac{w_m^2}{2b}\right)$$

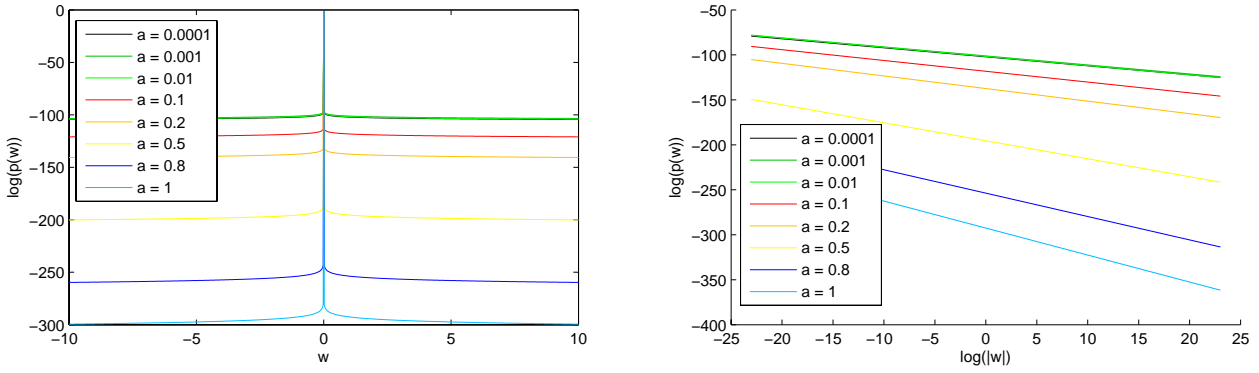

**Fig. 8.** Plot of the marginal prior distribution on a single weight for different choices of the hyperparameter  $a$ . To make the plot we approximated  $b \rightarrow 0$  by  $b = 1E - 80$ , that is a similar conceptual plot as would be drawing a delta function by a normal distribution with  $\sigma = 1E - 80$ .

and we are interested in the case when  $b \rightarrow 0$ , which gives (18):

$$\log p(\mathbf{w}) \xrightarrow{b \rightarrow 0} C(a) + (1 + 2a) \sum_{m=0}^{M-1} \log |w_m|$$

This sparseness cost is depicted for a single nonzero weight and several  $a$  in Figure 8 and for multiple nonzero weights and a single  $a$  in Figure 3. The approximately flat tails makes this sparseness cost a good approximation of the  $l_0$  norm, and much more desirable than the  $l_1$  norm (i.e. Laplacian prior). Considering specifically  $a$  in (18) and Figure 8, we can see that the sparseness penalty is proportional to  $(1 + 2a)$ . For example, in Figure 8 (left), for  $a = 1$  we get a penalty of around 300 for large coefficients as compared to 100 when  $a \sim 0$ , i.e.  $(1 + 2a)$  times higher. Therefore, we can increase the sparseness by increasing  $a$ , this takes mass away from the tails and puts it on the “delta” (point mass at 0) by decreasing the rate on the tail decay. In Figure 8 (right), the tail decay rate is about  $(1 + 2a)$  on the natural logarithmic scale.

The parameter  $a$  also has an impact on the convergence rate of the EM algorithm, i.e., the speed of the SBL algorithm. In our experiments, for higher sparseness settings (fewer breakpoints and larger  $a$ ), the algorithm converges faster than for smaller  $a$ . This is also supported with the following argument. The  $\alpha_m^{-1}$  parameters, either converge to 0 (breakpoint discarded) or to a finite point (breakpoint accepted). The EM algorithm rate of convergence is governed by the maximum eigenvalue of the Jacobian matrix of the EM mapping defined in (17), (McLachlan and Krishnan, 1997). In that situation,  $1/(1 + 2a)$  would pull out of the derivative of  $\alpha_m^{-1}$  in (17); thus speeding up convergence since the maximum eigenvalue is divided by  $1/(1 + 2a)$ .

In conclusion, the  $a$  parameter controls the sparseness in the SBL algorithm, and the speed of the algorithm. An increase of  $a$  leads to a sparser result, fewer breakpoints, and faster convergence.

#### 4 BACKWARD ELIMINATION ALGORITHM DETAILS

The backward elimination (BE) procedure could be used alone for CNA detection. It is based on considering our PWC model (6) as a classical variable regression selection problem,  $\mathbf{y} \sim \mathbf{F}\mathbf{w}$ ; where the regressors  $w_i$  with less impact on the residual are sequentially

removed one by one. To the best of our knowledge, this simple procedure has never been proposed as a standalone technique for CNA detection. This is a greedy approach, which is suboptimal since we may eliminate breakpoints that could be more significant at a later stage. Since errors can be added by each greedy decision, this algorithm tends to be more reliable when the number of regressors (i.e., candidate breakpoints) is smaller. Compared to forward selection (FS), backward elimination (BE) has been seen to perform better in situations where, as in our case, the columns of  $\mathbf{F}$  have high degree of collinearity (Kohavi and John, 1997). Furthermore, the structure of  $\mathbf{F}$ , the design matrix, can be exploited to efficiently find and remove each breakpoint and produce a ranking list as detailed in Algorithm 2.

Using standard linear regression, for a given fixed breakpoint set  $\mathcal{I}$ , the least squares estimate for the breakpoint weights  $\mathbf{w}_{\mathcal{I}}$  is found by solving the normal equations:

$$\begin{aligned} \mathbf{F}_{\mathcal{I}}^t \mathbf{y} &= \mathbf{F}_{\mathcal{I}}^t \mathbf{F}_{\mathcal{I}} \hat{\mathbf{w}}_{\mathcal{I}} \\ \hat{\mathbf{w}}_{\mathcal{I}} &= (\mathbf{F}_{\mathcal{I}}^t \mathbf{F}_{\mathcal{I}})^{-1} \mathbf{F}_{\mathcal{I}}^t \mathbf{y} \end{aligned} \quad (27)$$

which gives the orthogonal projection  $\hat{\mathbf{x}}_{\mathcal{I}}$  of the vector  $\mathbf{y}$  on  $\mathcal{S}_{\mathcal{I}}$  as:

$$\hat{\mathbf{x}}_{\mathcal{I}} = \mathbf{F}_{\mathcal{I}} \hat{\mathbf{w}}_{\mathcal{I}} \quad (28)$$

$$\hat{\mathbf{x}}_{\mathcal{I}} = \mathbf{F}_{\mathcal{I}} (\mathbf{F}_{\mathcal{I}}^t \mathbf{F}_{\mathcal{I}})^{-1} \mathbf{F}_{\mathcal{I}}^t \mathbf{y} \quad (29)$$

and the residual sum of squares  $RSS_{\mathcal{I}}$  or norm of the error is:

$$\begin{aligned} RSS_{\mathcal{I}} &= \|\mathbf{y} - \hat{\mathbf{x}}_{\mathcal{I}}\|^2 \\ &= \|\mathbf{y} - \mathbf{F}_{\mathcal{I}} \hat{\mathbf{w}}_{\mathcal{I}}\|^2 \end{aligned} \quad (30)$$

All these operations can be solved efficiently by noticing again that  $\mathbf{H}_{\mathcal{I}} = (\mathbf{F}_{\mathcal{I}}^t \mathbf{F}_{\mathcal{I}})^{-1}$  is a symmetric tridiagonal matrix, with main diagonal  $\mathbf{h}_0$  (19) and first off-diagonals  $\mathbf{h}_1$  (20) (see lines 2 and 3 of Algorithm 2).

The criteria to decide which breakpoint to remove can be seen in three different but equivalent ways.

First, we might consider removing the breakpoint which increases the least the  $RSS_{\mathcal{I}}$ . If we denote  $RSS_j$  to be the residual sum of

the squares after removing  $i_j$  from  $\mathcal{I}$ , then the increase in  $RSS$  is:

$$RSS_j - RSS_{\mathcal{I}} = \frac{\hat{w}_{\mathcal{I}}^2(j)}{\mathbf{h}_0(j)} \quad (31)$$

Furthermore, when the noise is normal  $N(0, \sigma^2 \mathbf{I})$ ,

$$F_j = \frac{RSS_j - RSS_{\mathcal{I}}}{RSS_{\mathcal{I}}/(M - K)} \quad (32)$$

is distributed as  $F_{1, M-K}$  distribution ( $M$  is the number of candidate breakpoints, and  $K = |\mathcal{I}|$  the number of breakpoints in the model). If the  $\sigma^2$  is known, or  $M \gg K$ , then  $RSS_{\mathcal{I}}/(M - K) \rightarrow \sigma^2$  and  $F_{1, \infty} \sim \chi_1^2$ ; thus

$$t_j^2 = \frac{RSS_j - RSS_{\mathcal{I}}}{\sigma^2} = \frac{\hat{w}_{\mathcal{I}}^2(j)}{\sigma^2 \mathbf{h}_0(j)} \quad (33)$$

is distributed as a  $\chi_1^2$  distribution.

Second, if we assume that the noise is normal  $N(0, \sigma^2 \mathbf{I})$ , and  $\sigma^2$  is known. Then the least squares estimate for  $\hat{w}_{\mathcal{I}}$  is also normally distributed:

$$\hat{w}_{\mathcal{I}} \sim N(\mathbf{w}_{\mathcal{I}}, \mathbf{H}_{\mathcal{I}}/\sigma^2) \quad (34)$$

Therefore, under the hypothesis that  $w_{\mathcal{I}}(j) = 0$

$$t_j \equiv \frac{\hat{w}_{\mathcal{I}}(j)}{\sqrt{\sigma^2 \mathbf{h}_0(j)}} \sim N(0, 1) \quad (35)$$

Third, developing what  $t_j$  represents in terms of  $\mathbf{y}$  and  $\sigma^2$  by performing all the operations in (27), we can see that:

$$t_j = \frac{\left( \frac{1}{i_{j+1} - i_j} \sum_{m=i_j+1}^{i_{j+1}} y_m \right) - \left( \frac{1}{i_j - i_{j-1}} \sum_{m=i_{j-1}+1}^{i_j} y_m \right)}{\sigma \sqrt{\frac{1}{i_{j+1} - i_j} + \frac{1}{i_j - i_{j-1}}}} \quad (36)$$

which can be interpreted as the difference between the sample mean of the right and the left segment of  $i_j$  breakpoint divided by the square root of the variance of that difference. Even if the noise is not normal, but has a finite variance  $\sigma^2$ , (36) tells us that as the size of the segments increases, under the null hypothesis of no difference,  $t_j$  will converge to  $N(0, 1)$  because of the central limit theorem.

Recalculation of the weights after each removal, can be done efficiently with very few (a constant amount of) operations using the weights already calculated (see lines 9,12 and 16 on Algorithm 2). Thus the overall order of complexity to rank a breakpoint set  $\mathcal{I}$  is linear with the size of the set  $O(|\mathcal{I}|)$ .

#### 4.1 The role of the $T$ parameter in BE ranking

The ranking provided by the backward elimination procedure, Algorithm 2, can be used to quickly return a breakpoint set with different degrees of sparseness that contains the breakpoints with the strongest evidence. This is done by cutting the ranking  $r$  at some specified threshold  $T$ , such that all the remaining breakpoints have a  $|t_j| \geq T$ . Both true positives and false positives will decrease with increasing level of sparseness, i.e. higher  $T$ ; but if  $P(|t_j| \geq T | w_j = 0) < P(|t_j| \geq T | w_j \neq 0)$  the expected proportion of false breakpoints on the returned set, i.e. the false

discovery rate FDR, will be monotonically decreasing with  $T$ . The previous condition is true for Gaussian noise but will also be true for other symmetrically bell shaped noise distributions.

Additionally, we can associate a  $p$ -value for any particular value of  $t$ , or a significance cutoff  $\alpha = P(|t_j| \geq T | w_j = 0)$  for any  $T$ , if we assume the noise is normal, using (35). If the noise is not Gaussian, the  $p$ -value will still be a good approximation for the breakpoints with large flanking segments (i.e. the two neighboring breakpoints are far apart), since  $t$  will converge to a normal distribution under the null hypothesis for any iid finite variance noise. Alternatively, or for small segments we could estimate the  $p$ -value by a resampling method or replace the  $t$  score by a non-parametric ranksum test. In any case, it is important to notice that the computed  $p$ -value is associated with a single breakpoint in one of the many possible segmentations; thus, it does not take into account all the possible segmentations that are effectively tested during the algorithm, i.e. multiple hypothesis testing or multiple comparison problem.

Commonly used tools to solve this problem are not recommended here because they do not take into account the special correlation structure that exists between the  $t$  scores of overlapping or neighboring segmentations, and the independence between the  $t$  scores separated by one breakpoint or more. Solving the problem of the multiple testing in this scenario, in the sense of being able to provide a  $T$  that controls for the FDR being below some bound is beyond the scope of this paper. However, since the FDR is monotonically decreasing with  $T$ , we can adjust it to achieve a particular degree of sparseness, and then estimate the FDR that corresponds to that  $T$  either using results from multiple samples, replicates or by a resampling procedure.

## 5 SEGMENT ALTERATION DETECTION

The SBL and BE procedures are segmentation approaches that make no assumptions on the amplitude of the reconstructed segments. The objective is to provide a nearly optimal set of amplitudes and breakpoint positions that best fits the hybridization intensities observed in the array as described in (8). Once the breakpoints are fixed, in order to achieve the minimal residual error  $RSS$ , the amplitude corresponding to each segment is given by the average hybridization level of all the probes that fall inside that segment. The consequence of this model, is that segments that correspond to the same underlying copy number state may be given a different reconstruction amplitude; and, an additional step has to be done to classify these segments into a copy number (0, 1, 2, 3, 4, ...) or alteration status (*Non-Altered*, *Gain* and *Loss*).

There already exists two alternatives to perform this additional step, since it is also required in other segmentation procedures like DNACopy (Olshen *et al.*, 2004) and CGHseg (Picard *et al.*, 2005). The first alternative, also used in smoothing and thresholding methods (Pollack *et al.*, 1999; Huang *et al.*, 2004), assumes or estimates a baseline *Non-Altered* mean hybridization level and classifies all the segments whose amplitude are significantly above (below) that level as *Gain* (*Loss*), or *Non-Altered* otherwise. The second alternative is the MergeLevels algorithm (Willenbrock and Fridlyand, 2005), that reduce the number of different reconstruction amplitudes by recursively merging those that are the least significantly different. The final smaller set of levels may be associated with a copy number state (0, 1, 2, 3, 4, ...).

Other CNA detection approaches, specially those that are based on HMMs automatically incorporate the classification encoded in the different states of a hidden variable associated with each probe. However, as we discussed in the introduction, this may not be a good model when the number of hidden states that has been assumed does not match the true number of underlying mean hybridization levels. This is specially likely to occur when analyzing tumor samples which represent mixtures of cells with different copy number state, because cancer genomes are inherently unstable and heterogeneous (Garraway *et al.*, 2005).

## 6 ADJUSTMENT OF THE SBL AND BE PARAMETERS IN GADA

Both the SBL or the BE procedure could be used independently to estimate copy number changes. However, the best results and flexibility are obtained with the combination of these two algorithms as was discussed in section 2.8.

The objectives of this section are: 1) show that SBL and BE elimination produce breakpoint sets that are subsets of those obtained from higher sparseness settings, higher  $T$  or  $a$ , and can produce equivalent breakpoint sets; 2) propose a strategy for efficient parameter adjustment in the most general case; 3) evaluate the effectiveness of this strategy in the Willenbrock and Fridlyand simulated dataset.

The experiments consist of drawing simulated chromosomes of different lengths  $M$  ( $M=100, 200, 500, 1000$  and  $2000$  probes per chromosome), in the following conditions:

- i. Simulation of null hypothesis, (no breakpoints) using normal noise with different levels of variance.
- ii. Simulation of normal copy number variations (few breakpoints and short segments) with real noise obtained by randomly sampling segments of data of size  $M$  from a pool of a normal (diploid genome) CEPH cell line samples analyzed by Affymetrix 250K Nsp array platform.
- iii. Simulation on cancer copy number variations, by sampling random chunks of data of size  $M$  from cancer samples analyzed in section 3.3.
- iv. Evaluation on the simulated dataset analyzed in section 3.1, (only  $M=100$ ).

For i. to iii. we simulated  $L = 10000$  chromosomes, for the last case iv. all the  $L = 500 \times 20 = 2000$  chromosomes of size  $M = 100$  were used. Each sample, i.e. chromosome, was analyzed with different options of  $a$  and  $T$ , and the returned breakpoint sets were evaluated using different metrics. The sparseness of each set was computed as the number of returned breakpoints divided by the size of the chromosome, i.e.  $|\mathcal{I}|/M$ , and  $\lambda$  denotes the average sparseness across all samples. When comparing two breakpoint sets  $\mathcal{A}$  and  $\mathcal{B}$  obtained for the same sample but with different parameter settings, we denote  $\mathcal{A} \cap \mathcal{B}$  the set of common breakpoints, which in our case includes all breakpoints in  $\mathcal{A}$  such that there exists a breakpoint in  $\mathcal{B}$  less than  $\delta$  probes away (if there are two breakpoints in  $\mathcal{A}$  closer than  $\delta$  to a breakpoint on  $\mathcal{B}$  then only the closest one is assigned to the intersection). We then computed the averages of the following metrics along the  $L$  simulated samples:

$$P(\mathcal{A} = \mathcal{B}) = \frac{|\mathcal{A} \cap \mathcal{B}|}{|\mathcal{A} \cup \mathcal{B}|} \quad (37) \quad P(\mathcal{A} \subset \mathcal{B}) = \frac{|\mathcal{A} \cap \mathcal{B}|}{|\mathcal{A}|} \quad (38)$$

which represent respectively the proportion of breakpoints that are the same on both sets, i.e. concordance, and the proportion of breakpoints on  $\mathcal{A}$  that are also in  $\mathcal{B}$ , i.e., inclusiveness of  $\mathcal{A}$  in  $\mathcal{B}$ .

### 6.1 Experiments adjusting $a$ and $T$ in GADA

In Figure 9, we can see that the initial breakpoint sets provided by SBL (at  $T = 0$ ), a higher  $a$  setting increases sparseness (bottom plots  $T = 0$ ); but at the same time the breakpoints remain the same since the  $P(\mathcal{A} \subset \mathcal{B}) > 99\%$  in all the cases. That means that breakpoint sets obtained with higher  $a$  tend to be subsets of those obtained with lower  $a$ .

As  $T$  increases we can see on the bottom plot that we are monotonically obtaining sparser sets. The breakpoints that we are removing with BE might be different depending on the initial conditions; for example,  $a = 0.8$  already has a high degree of sparseness so it will not start removing anything until  $T > 2.88$ , where the sparseness will start to curb down and eventually will converge to the curves obtained with lower  $a$ . On the top plot, we can see that this convergence is not only on the degree of sparseness alone but also on the breakpoint sets themselves too, since as  $T$  increases concordance goes to 1. That means that as we increase  $T$  we remove the extra part that it was in the breakpoint set obtained with lower  $a$  and we end up with the same breakpoints. Following the example with  $a = 0.8$ , we can see in Figure 9 A, that for  $T > 4.15$ , the concordance to starting with a lower  $a$  is higher than 80%; and for  $T > 4.25$  and  $T > 4.35$  we obtain concordances that are respectively higher than 90% and 95%.

This results indicate that we can adjust the sparseness of the result equivalently with  $a$  and  $T$  in a wide margin of settings to give the same breakpoint set. This behavior has been observed in all the experiment settings (i.-iv.). If there is something to be detected, true copy number alterations or outliers ii. then the probability of detection is higher and the high concordance is reached for smaller values of  $T$  than in the i. case (compare A and C, and B and C, on Figure 9). For iii. case (data not shown) the concordance is even higher since cancer samples contain more CNA. The size of the chromosome  $M$  have also some impact on the convergence; on chromosomes with larger  $M$  high concordance is reached at a higher  $T$ , but for  $M > 2000$  it does not move further more to the right. Additionally, our results on case i. are exactly the same for different noise power  $\sigma^2$  because both  $a$  and  $T$  have already been corrected by  $\hat{\sigma}^2$ .

### 6.2 Strategy to adjust $a$ and $T$ in GADA

Adjusting sparseness with  $T$  can be done at no additional computational cost, while adjusting  $a$  requires to run the EM algorithm again. Thus, a good strategy is to select a small  $a$  for SBL that provides an initial breakpoint set that reduces most of the unlikely breakpoints but still ensures a high sensitivity; i.e. we do not want to miss anything on the first step that would require us to switch back to a lower  $a$ . Then, the final degree of sparseness will be adjusted with  $T$ .

From the previous experiment in concordance between sets, we can see that a good sensitivity means that we do not remove anything

that would not be removed with a lower  $a$  at the same  $T$ . The worst case, i.e. requiring a higher  $T$  for the same concordance, is where there is nothing to be detected. In other words, the true copy number alterations that produce an observation that resembles more pure Gaussian noise are the hardest to be detected.

Moreover, dense arrays (higher  $M$ ) will be more sensitive because CNA will be sampled with more probes and will produce statistically larger  $t$ . Thus, small arrays will be those requiring the smallest  $T$  to be highly sensitive. Even smallest arrays with 100 probes per chromosome,  $T = 4$  provides enough initial sensitivity. Thus, we find that  $a = 0.2$  should be small enough in general, and is the value that we have always used in all the results on section 3.

It is always possible to determine if  $a = 0.2$  (or any other choice) is small enough for a particular  $T$  of interest by rerunning the algorithm with a lower  $a$ , e.g.  $a = a/2$ , and checking if the set of breakpoints returned for that particular  $T$  and different  $a$ 's are essentially the same (e.g.,  $> 95\%$  concordant).

### 6.3 Sensitivity to the adjustments of $a$ and $T$

We will use the simulation case iv., to evaluate the impact of the parameter setting strategy described in the previous section in terms of accuracy. This is the same dataset as the one used in section 3.1 and by Willenbrock and Fridlyand (2005), where the underlying breakpoints are known, so we can exactly evaluate the FDR and the sensitivity for different choices of  $T$  and  $a$ .

In Figure 10, curves corresponding to different  $a$  have different starting point in terms of sensitivity and FDR, but as  $T$  increases we decrease the FDR and similar operational points in terms of sensitivity and FDR are reached compared to those obtained from different  $a$ . The proposed  $a = 0.2$  in the previous section offers an initial sensitivity and FDR such that all the remaining points in the curve are reached adjusting only  $T$ , providing all the levels of sensitivity or FDR that we might be interested in using without having to switch to another  $a$ .

Compared to CBS, we are able to obtain a wider margin of operating points of the PROC curve. Moreover, independently of the initial  $a$  we always have a point with similar or better average performance either in terms of FDR or sensitivity.

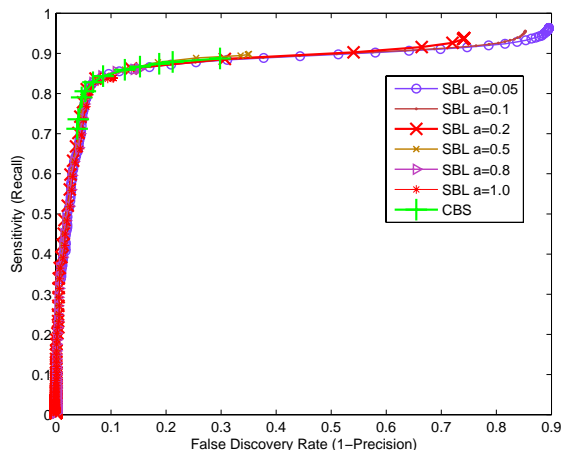

**Fig. 10.** PR operational curves for sensitivity vs. false discovery rate in detecting copy number changes within  $\delta = 2$  probe window. Each line corresponds to SBL+BE with different starting breakpoint sets ( $a = 0.05, 0.1, 0.2, 0.5, 0.8, 1.0, 1.5$ ) and varying  $T$  ( $T$  increases as we traverse the curve from right to left, i.e. FDR decreases). The light green curve represents the operating points obtained by CBS with different  $\alpha = 1E - 4, 0.001, 0.002, 0.005, 0.01, 0.05$

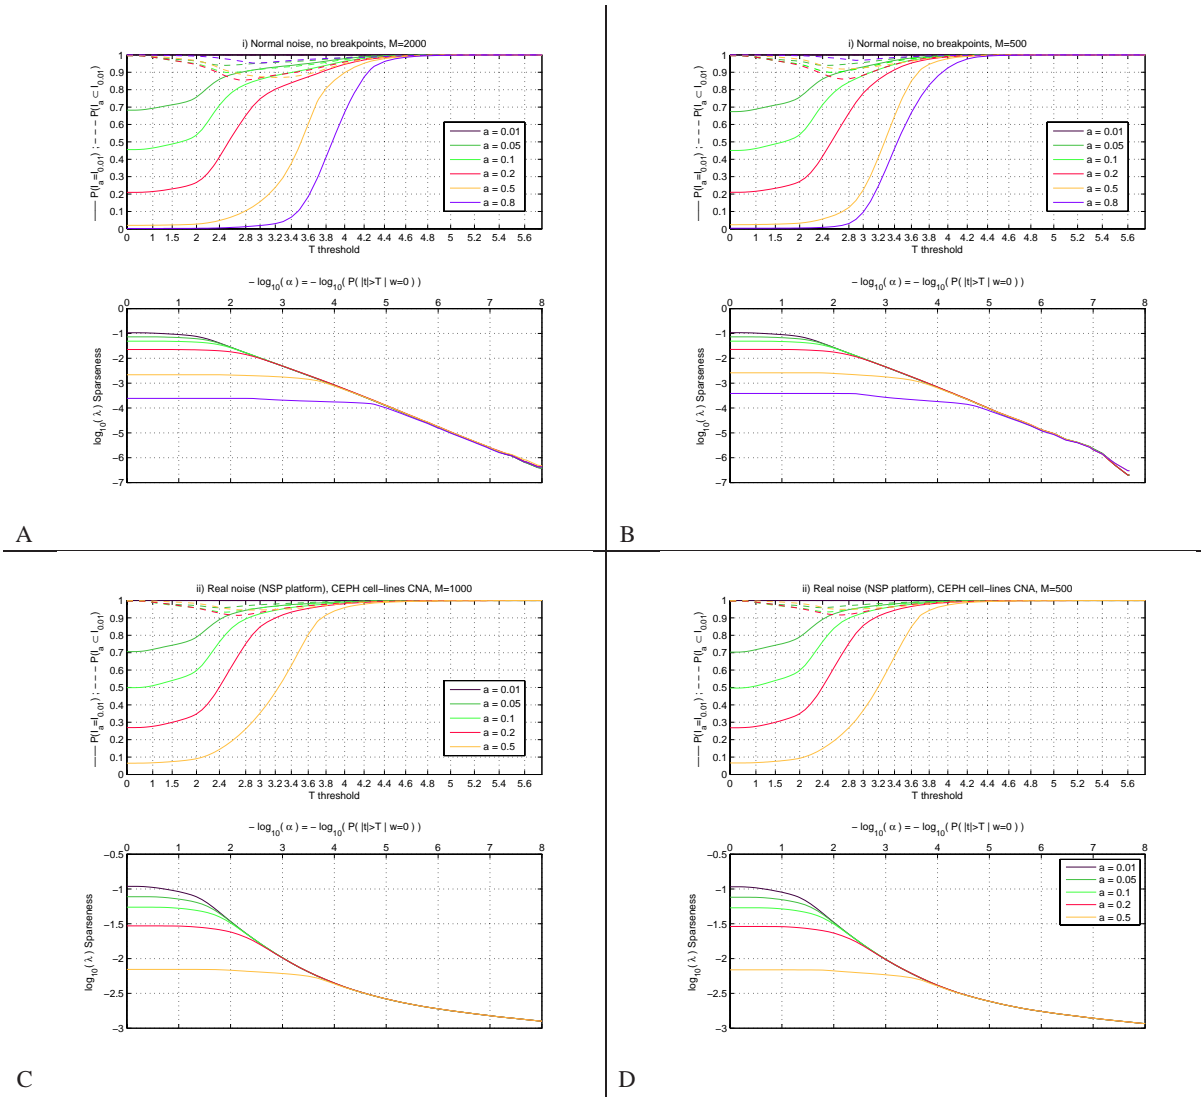

**Fig. 9.** The four panels (A,B,C and D) represent a different experimental dataset, with the results of applying different settings of  $a$  and  $T$  parameters. Each color corresponds to different setting of  $a = 0.01, 0.05, 0.1, 0.2, 0.5$ , and the  $x$ -axis increasing values of  $T$  or its associated significance level  $\log_{10}(\alpha)$ . On the top plot we have represented the inclusiveness  $P(\mathcal{I}_a \subset \mathcal{I}_{a=0.01})$  (dashed line) and the concordance  $P(\mathcal{I}_a = \mathcal{I}_{a=0.01})$ . The concordant breakpoints are defined within a window of  $\delta = 2$  probes. The bottom plot represents the sparseness which on A and B also represent specificity because there are no underlying breakpoints. A and B use the normal noise simulation described in i. with chromosome lengths of  $M = 500$  and  $M = 2000$  (different noise levels  $\sigma^2$  generate exactly the same curves); and C and D use the simulation described in ii. with chromosome lengths of  $M = 500$  and  $M = 1000$ .

## 7 SUPPLEMENTARY RESULTS TABLES AND FIGURES

**Table 5.** Significant copy number alterations found in four neuroblastoma cell lines

| Chr. | SK-N-BE2            | SMS-KAN             | LAN-6                    | CHLA-20             |
|------|---------------------|---------------------|--------------------------|---------------------|
| 1:   |                     | -(pEnd-p13.3)       | -(pEnd-p36.12)           |                     |
|      | +(p21.3-qEnd)       |                     | +(p21.1-qEnd)            | +(p21.1-qEnd)       |
| 2:   | +(pEnd-p21)         | +(pEnd-p24.1)       | +(pEnd-p22.1)            | ++(pEnd-p16.1)      |
|      | ++p24.3 <b>MYCN</b> | ++p24.3 <b>MYCN</b> |                          | +(p16.1-q31.1)      |
|      |                     | ++p24.1             | +q35                     |                     |
|      |                     | -q22.1              |                          |                     |
|      |                     | -q23.3              |                          | +(q32.2-q37.2)      |
| 3:   | -(pEnd-p14.2)       |                     | -(pEnd-p14.3)            |                     |
|      |                     | +(p12.1-p11.1)      |                          |                     |
| 4:   |                     |                     |                          | -(p16.1-p15.33)     |
|      |                     | -(q12-q22.1)        |                          | -p24 <b>KLHL5</b>   |
|      |                     | -q22.3              | +(q35.1-q35.2)           | +(q34.1-qEnd)       |
| 5:   |                     |                     | -(q35.3-qEnd)            | +q11.2              |
| 6:   |                     |                     | -(q12-p16.3)             |                     |
|      |                     |                     | -(q22.31-qEnd)           |                     |
|      |                     |                     | -- q26 <b>PARK</b>       |                     |
| 7:   |                     |                     | +(pEnd-p15.1)            |                     |
|      |                     |                     | -q21.1 <b>AHR</b>        | +7                  |
|      |                     |                     | -(p14.3-q11.21)          |                     |
|      |                     |                     | -(p11.21-q11.22)         | -q33 <b>SEC8L1</b>  |
| 8:   |                     |                     | -(pEnd-p12)              |                     |
|      |                     |                     | -(q22.1-q23.3)           | +q21.3              |
|      | --q24.23            |                     |                          | +(q22.2-q24.1)      |
| 9:   |                     |                     | -p24.2 <b>GLIS3</b>      |                     |
|      |                     |                     | -(p23-p21.2)             |                     |
|      |                     |                     | --p21.3 <b>MTAP</b>      |                     |
|      |                     |                     | -p13.3 <b>RECK</b>       |                     |
| 10:  |                     | +(pEnd-p11.23)      |                          |                     |
|      |                     | -q22.3 <b>PTPRE</b> |                          |                     |
| 11:  | +(q13.1-qEnd)       | -(q14.2-q23.3)      | +(q13.4-q25)             | -q14.1              |
|      |                     |                     | --(q25-qEnd)             | +q22.1 <b>CNTNS</b> |
| 12:  |                     |                     | +(q23.3-q24.33)          | +12                 |
|      |                     |                     | ++ q24.33                |                     |
| 13:  |                     |                     | -q31.1                   |                     |
| 14:  |                     |                     | -(q23.2-qEnd)            |                     |
|      |                     |                     | +0(q31.3) <b>TTC8</b>    |                     |
| 15:  |                     |                     |                          |                     |
| 16:  |                     | +16q                | +(pEnd-p13.3) <b>LEP</b> |                     |
| 17:  |                     |                     | --p11.2 <b>EPN2</b>      |                     |
|      | -(pEnd-q11.2)       |                     | -(pEnd-q11.2)            | +17                 |
|      |                     |                     | +(q21.2-qEnd)            |                     |
| 18:  | -18                 |                     |                          | +(p11.23-qEnd)      |
| 19:  |                     | -(q13.2-q13.33)     |                          | +19p                |
| 20:  | -p13                |                     |                          |                     |
| 21:  |                     |                     |                          |                     |
| 22:  |                     |                     |                          |                     |
| X:   | X                   | XX                  | X                        | XX                  |

Table listing the most significant copy number alterations  $T = 5$ , that have been found on at least two of the platforms (Xba,Nsp,Sty,Nsp+Sty) being analyzed.

**Table 8.** Differences in copy number breakpoint placing between chips

| Chips compared                    | # cases | MAD [BP] |       | K-S p-value |            |
|-----------------------------------|---------|----------|-------|-------------|------------|
|                                   |         | GADA     | CBS   | GADA larger | CBS larger |
| $\min( Xba - Sty ,  Xba - Nsp ):$ |         |          |       |             |            |
|                                   | 59      | 95670    | 93132 | 0.54        | 0.76       |
| $ Nsp - Sty :$                    |         |          |       |             |            |
|                                   | 61      | 88024    | 71265 | 0.35        | 1.0        |
| $ (Nsp\&Sty) - Illumina :$        |         |          |       |             |            |
|                                   | 91      | 22784    | 21388 | 0.58        | 0.95       |

For the confirmed breakpoints and excluding those near the centromere, we computed the median absolute difference in breakpoint location between chips (units in base pairs [BP]), and the p-value associated with the Kolmogorov-Smirnov test for the hypothesis that differences are stochastically larger (i.e. less accurate) in one algorithm vs. the other. No significant changes in accuracy have been found.



**Table 6.** Copy number breakpoints found on all platforms

| Cell-line name | Chr & Cytoband | GADA Position [BP] |           |           |           |           | CBS Position [BP] |           |           |           |           |
|----------------|----------------|--------------------|-----------|-----------|-----------|-----------|-------------------|-----------|-----------|-----------|-----------|
|                |                | Xba                | Nsp       | Sty       | Nsp+Sty   | Illumina  | Xba               | Nsp       | Sty       | Nsp+Sty   | Illumina  |
| SK-N-BE2       | 1p21.3         | 97045920           | 96895983  | 97183094  | 96895983  | 96808701  | 96602215          | 96564172  | 95918556  | 96486927  | 96808701  |
| SK-N-BE2       | 2p24.3         | 15977810           | 15978001  | 15977810  | 15978001  | 15979864  | 15977810          | 15978001  | 15977810  | 15978001  | 15979864  |
| SK-N-BE2       | 2p24.3         | 16419609           | 16453092  | 16462002  | 16462002  | 16463522  | 16419609          | 16453092  | 16462002  | 16462002  | 16465097  |
| SK-N-BE2       | 2p21           | 48447814           | 47722197  | 48071628  | 47629563  | 47840828  | 48447814          | 47728339  | 48071628  | 47738916  | 47840828  |
| SK-N-BE2       | 3p14.2         | 61381385           | 61301823  | 61423021  | 61159361  | 61312730  | 61227509          | 61301823  | 61137444  | 61241447  | 61312730  |
| SK-N-BE2       | 8q24.23        | 137748993          | 137757306 | 137735555 | 137747078 | 137747933 | 137748993         | 137746403 | 137735555 | 137746403 | 137747933 |
| SK-N-BE2       | 8q24.23        | 137892295          | 137955330 | 137924208 | 137924208 | 137919630 | 137892295         | 137931617 | 137924208 | 137931617 | 137919630 |
| SK-N-BE2       | 11q13.1        | 64310154           | 64977325  | 65339642  | 65010150  | 65335248  | 64310154          | 64977325  | 65339642  | 65339642  | 65193464  |
| SK-N-BE2       | 17q11.2        | 28109086           | 28263828  | 28164827  | 28283675  | 28247634  | 28109086          | 28263828  | 28164827  | 28266739  | 28214976  |
| SK-N-BE2       | 20p13          | 2406160            | 2773972   | 3036010   | 3036010   | 2987115   | 2406160           | 2773972   | 3036010   | 3036010   | 2987115   |
| SMS-KAN        | 1p13.3         | 108157301          | 107888773 | 108203626 | 108218567 | 108177825 | 108157301         | 108208349 | 108186644 | 108178227 | 108177825 |
| SMS-KAN        | 2p24.3         | 15721907           | 15868241  | 15853157  | 15868241  | 15869663  | 15721907          | 15868241  | 15853157  | 15868241  | 15869663  |
| SMS-KAN        | 2p24.3         | 16419609           | 16576876  | 16551640  | 16576876  | 16578889  | 16419609          | 16576876  | 16551640  | 16576876  | 16578889  |
| SMS-KAN        | 2p24.1         | 21887032           | 21974989  | 22013932  | 22013932  | 21992435  | 21887032          | 21974989  | 22013932  | 22013932  | 21992435  |
| SMS-KAN        | 2p24.1         | 22466771           | 22475341  | 22470539  | 22475341  | 22475673  | 22466771          | 22475341  | 22470539  | 22475341  | 22475673  |
| SMS-KAN        | 3p12.1         | 83843045           | 84210511  | 84386931  | 83873910  | 84165323  | 85157384          | 84137907  | 84386931  | 83960187  | 84165323  |
| SMS-KAN        | 3p11.1         | 88163152           | 90346746  | 97369003  | 90346746  | 90472437  | 88163152          | 90346746  | 96620438  | 90346746  | 90472437  |
| SMS-KAN        | 4q12           | 55018889           | 55049094  | 55058835  | 55049094  | 55040244  | 55152302          | 55049094  | 55056941  | 55049094  | 55040244  |
| SMS-KAN        | 4q22.2         | 94894653           | 94792613  | 94948871  | 94957181  | 94937901  | 94894653          | 94833508  | 94919018  | 94872717  | 94940338  |
| SMS-KAN        | 10p11.23       | 30297356           | 30435753  | 30721148  | 30685964  | 30559838  | 30297356          | 30552553  | 30721148  | 30551022  | 30551022  |
| SMS-KAN        | 10q26.2        | 129582283          | 129682011 | 129741611 | 129741611 | 129689191 | 129582283         | 129686948 | 129693110 | 129689191 | 129689191 |
| SMS-KAN        | 10q26.2        | 130102560          | 130079710 | 130148252 | 130148252 | 130172807 | 130095140         | 130168048 | 130148252 | 130172807 | 130172807 |
| SMS-KAN        | 11q14.2        | 85287454           | 85435237  | 85383124  | 85383124  | 85381622  | 85287454          | 85367689  | 85383124  | 85383124  | 85381622  |
| SMS-KAN        | 11q23.3        | 117735474          | 117791205 | 118235879 | 118235879 | 117802601 | 117735474         | 117791205 | 117823148 | 117823148 | 117802601 |
| SMS-KAN        | 19q13.2        | 45796700           | 45571967  | 45879279  | 45879279  | 45910451  | 45796700          | 45571967  | 45879279  | 45879279  | 45910451  |
| SMS-KAN        | 19q13.33       | 57641156           | 57395071  | 57400799  | 57395071  | 57374324  | 57641156          | 57395071  | 57322747  | 57395071  | 57374324  |
| LAN-6          | 1p36.33        | 21940846           | 22438012  | 22476248  | 22476248  | 22480144  | 22445846          | 22438012  | 22476248  | 22476248  | 22480144  |
| LAN-6          | 1q21.1         | 142661525          | 143607676 | 143798352 | 143887291 | 144106312 | 142661525         | 143607676 | 143798352 | 143798352 | 144106312 |
| LAN-6          | 2p22.1         | 42656869           | 41405461  | 33909326  | 41340562  | 41358977  | 42656869          | 41405461  | 41355143  | 41340562  | 41358977  |
| LAN-6          | 2q36           | 218185198          | 218577787 | 218754682 | 218756027 | 218628755 | 218395997         | 218577787 | 218754682 | 218628755 | 218628755 |
| LAN-6          | 2q36           | 220406369          | 220398375 | 220629809 | 220629809 | 220449867 | 220406369         | 220534849 | 220475305 | 220480390 | 220449867 |
| LAN-6          | 3p14.3         | 57324905           | 57032227  | 57238434  | 57238434  | 57215650  | 57324905          | 57032227  | 57238434  | 57238434  | 57215650  |
| LAN-6          | 6q12           | 68022441           | 68353881  | 68154792  | 68095015  | 68197504  | 68022441          | 68095015  | 67263660  | 68095015  | 68197504  |
| LAN-6          | 6p16.3         | 106344198          | 105090334 | 105177437 | 105110313 | 105135994 | 105275051         | 105090334 | 105110313 | 105110313 | 105112419 |
| LAN-6          | 6q22.31        | 123295546          | 123710384 | 123731764 | 123710384 | 123710826 | 123295546         | 123710384 | 123605395 | 123710384 | 123710826 |
| LAN-6          | 7p15.1         | 27784099           | 24892359  | 24256367  | 24892359  | 24919337  | 27784099          | 31129325  | 25064458  | 24892359  | 24919337  |
| LAN-6          | 7p14.3         | 31126902           | 31129325  | 31135758  | 31135758  | 31145274  | 31126902          | 31129325  | 31135758  | 31135758  | 31145274  |
| LAN-6          | 7q11.21        | 62171000           | 62343621  | 63050316  | 63050316  | 62336389  | 62171000          | 62910986  | 62283233  | 62934268  | 62336389  |
| LAN-6          | 7q11.21        | 63993279           | 63940919  | 63137057  | 63940919  | 63963370  | 63993279          | 63940919  | 65748163  | 63940919  | 63963370  |
| LAN-6          | 7q11.22        | 69847573           | 69835520  | 68907809  | 69835520  | 69831960  | 69738283          | 69835520  | 69807385  | 69835520  | 69831960  |
| LAN-6          | 8p12           | 39331612           | 37835460  | 37192319  | 38093651  | 37869447  | 37458281          | 37835460  | 38093651  | 38093651  | 37869447  |
| LAN-6          | 8q22.1         | 93948610           | 95445117  | 95274323  | 95445117  | 95414304  | 96630283          | 95445117  | 95372632  | 93945648  | 95414304  |
| LAN-6          | 8q23.3         | 116469762          | 116142633 | 116478611 | 116140376 | 116480735 | 116519714         | 116472717 | 116471437 | 116472717 | 116480735 |
| LAN-6          | 9p24.2         | 3394434            | 3579281   | 3316679   | 3579281   | 3585674   | 3394434           | 3579281   | 3316679   | 3579281   | 3585674   |
| LAN-6          | 9p24.2         | 4947650            | 4635935   | 4685068   | 4648449   | 4647040   | 4947650           | 4630212   | 4624827   | 4624827   | 4647040   |
| LAN-6          | 9p23           | 12741741           | 12643846  | 13524659  | 12649691  | 12706172  | 12741741          | 12643846  | 12164190  | 12754534  | 12716962  |
| LAN-6          | 9p21.3         | 21451790           | 21460464  | 21460997  | 21460997  | 21468318  | 21451790          | 21460464  | 21460997  | 21460997  | 21464643  |
| LAN-6          | 9p21.3         | 22185820           | 22158464  | 22197037  | 22197037  | 22197037  | 22404973          | 22158464  | 22197037  | 22197037  | 22197037  |
| LAN-6          | 9p21.2         | 28417657           | 28860162  | 28929272  | 28820009  | 28857478  | 28765609          | 28853202  | 28842971  | 28820009  | 28844830  |
| LAN-6          | 11q13.4        | 71592372           | 71549242  | 71591974  | 71591974  | 71607855  | 71592372          | 71549242  | 71591974  | 71591974  | 71634231  |
| LAN-6          | 12q23.3        | 105993065          | 106086197 | 106095939 | 106095939 | 106074551 | 105993065         | 106086197 | 106232150 | 106095939 | 106074551 |
| LAN-6          | 14q23.1        | 60468351           | 60341891  | 60393691  | 60343301  | 60386017  | 60468351          | 60436455  | 60393691  | 60393691  | 60386017  |
| LAN-6          | 17q11.2        | 25755541           | 24749129  | 24833230  | 24836351  | 24865310  | 25755541          | 24836351  | 24833230  | 24836351  | 24865310  |
| LAN-6          | 17q21.2        | 36391251           | 35264341  | 36690164  | 35852756  | 35294289  | 36095487          | 35264341  | 36556209  | 36393487  | 35294289  |
| LAN-6          | 17q22          | 50618719           | 51862430  | 51475956  | 51862430  | 51856911  | 50618719          | 51862430  | 51475956  | 51862430  | 51856911  |
| CHLA-20        | 1q21.1         | 120089986          | 143607676 | 120928505 | 143887291 | 143328536 | 142661525         | 142756696 | 143798352 | 143657867 | 14802010  |
| CHLA-20        | 2p16.1         | 68885099           | 57662314  | 55736176  | 57577846  | 57662175  | 57629406          | 57662314  | 58097954  | 57625311  | 57583694  |
| CHLA-20        | 2q31.1         | 174726584          | 174705263 | 174793287 | 174717018 | 174730921 | 174726584         | 174705263 | 174717018 | 174717018 | 174730921 |
| CHLA-20        | 2q32.2         | 178651035          | 178581699 | 179377095 | 178574520 | 178576047 | 178214924         | 178574520 | 179028748 | 178574520 | 178576047 |
| CHLA-20        | 4p16.1         | 5722378            | 5842107   | 5913372   | 5842107   | 5842107   | 5722378           | 5842107   | 5913372   | 5842107   | 5842107   |
| CHLA-20        | 4p15.33        | 12551237           | 12300938  | 12392275  | 12321237  | 12316278  | 12551237          | 12300938  | 12391799  | 12321237  | 12300938  |
| CHLA-20        | 4q34.1         | 175185953          | 174895669 | 175097390 | 174895669 | 174897540 | 175185953         | 174895669 | 174890618 | 174895669 | 174895669 |
| CHLA-20        | 8q21.3         | 87234127           | 87640754  | 87583206  | 87583206  | 87594384  | 87858742          | 87640368  | 87583206  | 87583206  | 87594384  |
| CHLA-20        | 8q21.3         | 90473708           | 90386811  | 90407394  | 90407394  | 90366715  | 90138115          | 90372039  | 90407394  | 90376886  | 90366715  |
| CHLA-20        | 8q22.2         | 100574413          | 99817691  | 99940387  | 99940387  | 99638911  | 99803560          | 99817691  | 99940387  | 99940387  | 99638911  |
| CHLA-20        | 8q24.1         | 127917518          | 128903451 | 128922998 | 128922998 | 128913903 | 127917518         | 128903451 | 128922998 | 128922998 | 128913903 |
| CHLA-20        | 18p11.23       | 8617957            | 8510927   | 8200848   | 8510927   | 8392640   | 8617957           | 8393289   | 8309751   | 8448484   | 8392640   |
| CHLA-20        | 19q12          | 33171613           | 32761177  | 23876259  | 32690406  | 24095263  | 33171613          | 32761177  | 24165666  | 32690406  | 24053526  |

Table listing the locations for the copy number breakpoints detected by GADA and CBS on the four neuroblastoma cell-lines (SK-N-BE2, SMS-KAN, LAN-6, CHLA-20) that have also been found on all array platforms (Xba, Nsp, Sty, Nsp+Sty, Illumina).

**Table 7.** Copy number breakpoints found by at least two platforms

| Cell-line name | Chr & Cytoband | GADA Position [BP] |           |           |           |           | CBS Position [BP] |           |           |           |           |
|----------------|----------------|--------------------|-----------|-----------|-----------|-----------|-------------------|-----------|-----------|-----------|-----------|
|                |                | Xba                | Nsp       | Sty       | Nsp+Sty   | Illumina  | Xba               | Nsp       | Sty       | Nsp+Sty   | Illumina  |
| SMS-KAN        | 2q22.1         | 141962960          | 142006622 |           | 142006622 | 141996840 | 141962960         | 141991258 |           | 141991258 | 141996840 |
| SMS-KAN        | 2q22.1         | 142284086          | 142419855 |           | 142419855 | 142418322 | 142284086         | 142419855 |           | 142386408 | 142418322 |
| SMS-KAN        | 2q23.3         | 152928225          | 152959722 |           | 152945591 | 152947104 | 152928225         | 152959722 |           |           |           |
| SMS-KAN        | 2q23.3         | 153172826          | 153233532 |           | 153356905 | 153182040 | 153172826         | 153231102 |           |           |           |
| SMS-KAN        | 4q22.3         | 98081595           | 97971534  |           | 97971534  | 97946136  | 98081595          | 97971534  |           | 97971534  | 97946136  |
| SMS-KAN        | 4q22.3         | 98389453           | 98794422  |           | 98492192  | 98515047  | 98389453          | 98489669  |           | 98489669  | 98515047  |
| LAN-6          | 4q35.1         |                    | 187001741 | 187043679 | 187043679 | 187037031 |                   | 187001741 | 187248120 | 186997226 | 187037031 |
| LAN-6          | 4q35.2         |                    | 189693227 | 189400592 | 189537964 | 189715209 |                   | 189693227 | 189400592 | 189693227 | 189715209 |
| LAN-6          | 5q35.3         |                    | 178389593 | 178435944 | 178439675 | 178388353 |                   | 178389593 | 178435944 | 178439675 | 178388353 |
| LAN-6          | 6q26           |                    | 162768919 | 162672040 | 162783990 | 162769931 |                   | 162768919 | 162770133 | 162770133 | 162769931 |
| LAN-6          | 6q26           |                    | 163042210 | 162863051 | 163042210 | 163069487 |                   | 163073363 | 162948280 | 163042210 | 163069487 |
| LAN-6          | 7p21.1         | 17042942           | 17048506  |           | 17048506  | 17079506  |                   |           |           |           | 17079506  |
| LAN-6          | 7p21.1         | 17194089           | 17293268  |           | 17293268  | 17187461  |                   |           |           |           | 17194647  |
| LAN-6          | 9p13.3         |                    | 35932406  |           | 35934224  | 35923323  |                   |           |           |           | 35923323  |
| LAN-6          | 9p13.3         |                    | 36095264  |           | 36117196  | 36036596  |                   |           |           |           | 36036596  |
| LAN-6          | 11q25          |                    | 134393784 |           | 134408260 | 134410991 |                   |           |           |           | 134410991 |
| LAN-6          | 12q24.32       |                    | 125117158 |           | 125475975 | 125319087 |                   | 125257058 | 124609076 | 125131448 | 125319087 |
| LAN-6          | 12q24.33       |                    | 127723245 | 127722879 | 127723245 | 127723245 |                   | 127723245 | 127835197 | 127723245 | 127723245 |
| LAN-6          | 13q31.1        |                    |           |           | 82988642  | 82996585  |                   |           |           |           | 82996585  |
| LAN-6          | 13q31.1        |                    |           |           | 83045936  | 83063672  |                   |           |           |           | 83055928  |
| LAN-6          | 14q31.3        | 88300117           | 88381272  |           | 88443831  | 88310402  | 88300117          | 88381272  |           | 88443831  |           |
| LAN-6          | 14q31.3        | 88499809           | 88623396  |           | 88625132  | 88647502  | 88499809          | 88623396  |           | 88634883  |           |
| LAN-6          | 16p13.3        |                    | 5755300   | 5775884   | 5775884   | 5679682   |                   | 5669239   | 5775884   | 5802165   | 6023611   |
| LAN-6          | 16q23.3        |                    |           | 82340991  | 82342624  | 82374996  |                   | 86364648  | 82340991  | 82342624  | 82502789  |
| LAN-6          | 17             |                    | 19109505  |           | 19117656  | 19120783  |                   |           |           | 19117656  | 19120783  |
| LAN-6          | 17             |                    | 19175068  |           | 19175068  | 19145456  |                   |           |           | 19175068  | 19145456  |
| CHLA-20        | 2q37.2         |                    | 236702079 | 236768287 | 236768287 | 236738515 |                   | 236702079 | 236844697 | 236768287 | 236765691 |
| CHLA-20        | 4p14           |                    | 38741486  |           | 38741486  | 38758076  |                   | 38741486  |           | 38741486  | 38752396  |
| CHLA-20        | 4p14           |                    | 38996761  |           | 38996761  | 39068335  |                   | 38996761  |           | 38996761  | 39006763  |
| CHLA-20        | 5q11.2         |                    | 50870182  |           | 50824363  | 50850389  |                   | 50824363  |           | 50824363  | 50850389  |
| CHLA-20        | 5q11.2         |                    | 51529692  |           | 51532772  | 51532772  |                   | 51529692  |           | 51532772  | 51532772  |
| CHLA-20        | 7q33           |                    | 132875721 |           | 132875721 | 132884795 |                   | 132875721 |           | 132875721 | 132875949 |
| CHLA-20        | 7q33           |                    | 133004505 |           | 133004505 | 132996066 |                   | 133004505 |           | 133004505 | 132996066 |
| CHLA-20        | 11q14.1        |                    | 78683236  | 78694008  | 78694008  | 78691521  |                   |           | 78694008  | 78694008  | 78691521  |
| CHLA-20        | 11q14.1        |                    | 78805883  | 78801531  | 78801531  | 78814667  |                   |           | 78801531  | 78801531  | 78818346  |
| CHLA-20        | 11q22.1        | 99371373           | 99366936  |           | 99366936  | 99378927  | 99371373          | 99240362  |           | 99366485  | 99378927  |
| CHLA-20        | 11q22.1        | 100243669          | 100322922 |           | 100322922 | 100299086 | 100243669         | 100319819 |           | 100322922 | 100299086 |

Table listing the locations for the copy number breakpoints detected by GADA and CBS on the four neuroblastoma cell-lines (SK-N-BE2, SMS-KAN, LAN-6, CHLA-20) that have also been found on at two of the array platforms analyzed (Xba, Nsp, Sty, Nsp+Sty, Illumina).
